# Supplementary material
Source: Elsevier journal article supplement (https://www.sciencedirect.com/science/article/pii/S1575092213002076)
Supplement: mmc2 [file S1575092213002076:mmc2.pdf]

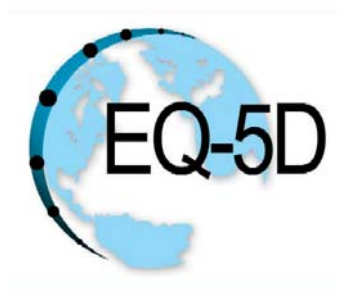

**Cuestionario de Salud**

**Versión Española**

*(Spanish version)*

Marque con una cruz la respuesta de cada apartado que mejor describa su estado de salud el día de HOY.

### **Movilidad**

- No tengo problemas para caminar ☐
- Tengo algunos problemas para caminar ☐
- Tengo que estar en la cama ☐

### **Cuidado Personal**

- No tengo problemas con el cuidado personal ☐
- Tengo algunos problemas para lavarme o vestirme ☐
- Soy incapaz de lavarme o vestirme ☐

**Actividades Cotidianas** (ej, trabajar, estudiar, hacer las tareas domésticas, actividades familiares o actividades durante el tiempo libre)

- No tengo problemas para realizar mis actividades cotidianas ☐
- Tengo algunos problemas para realizar mis actividades cotidianas ☐
- Soy incapaz de realizar mis actividades cotidianas ☐

### **Dolor/Malestar**

- No tengo dolor ni malestar ☐
- Tengo moderado dolor o malestar ☐
- Tengo mucho dolor o malestar ☐

### **Ansiedad/Depresión**

- No estoy ansioso ni deprimido ☐
- Estoy moderadamente ansioso o deprimido ☐
- Estoy muy ansioso o deprimido ☐

Para ayudar a la gente a describir lo bueno o malo que es su estado de salud hemos dibujado una escala parecida a un termómetro en el cual se marca con un 100 el mejor estado de salud que pueda imaginarse y con un 0 el peor estado de salud que pueda imaginarse.

Nos gustaría que nos indicara en esta escala, en su opinión, lo bueno o malo que es su estado de salud en el día de HOY. Por favor, dibuje una línea desde el casillero donde dice "Su estado de salud hoy" hasta el punto del termómetro que en su opinión indique lo bueno o malo que es su estado de salud en el día de HOY.

**Su estado  
de salud  
hoy**

El mejor estado  
de salud  
imaginable

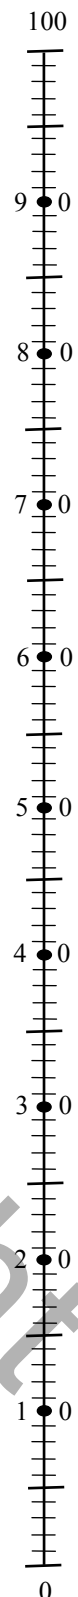

El peor estado  
de salud  
imaginable
